# Supplementary material for: Brief Communication: Evaluating Snow Depth Measurements from Ground-Penetrating Radar and Airborne Lidar in Boreal Forest and Tundra Environments during the NASA SnowEx 2023 Campaign
Source: Copernicus journal article supplement (doi:10.5194/egusphere-2025-2435), 2025-08-01
Supplement: Supplementary file 1 [file egusphere-2025-2435-supplement.pdf]

# Supplemental Information for Brief Communication: Evaluating Snow Depth Measurements from Ground-Penetrating Radar and Airborne Lidar in Boreal Forest and Tundra Environments during the NASA SnowEx 2023 Campaign

K. Holland-Goon<sup>1</sup>, R. Bonnell<sup>2,1</sup>, D. McGrath<sup>1</sup>, W.B. Baxter<sup>3</sup>, T. Meehan<sup>4</sup>, R. Webb<sup>5</sup>, C. Larsen<sup>6</sup>, H.P. Marshall<sup>7</sup>, M. Mason<sup>8,9</sup>, C. Vuyovich<sup>8</sup>

<sup>1</sup>Department of Geosciences, Colorado State University, Fort Collins, Colorado, USA

<sup>2</sup>U.S. Geological Survey, Water Resources Mission Area, Denver, Colorado, USA

<sup>3</sup>Cold Regions Research and Engineering Laboratory, U.S. Army Corps of Engineers, Fairbanks, Alaska, USA

<sup>4</sup>Cold Regions Research and Engineering Laboratory, U.S. Army Corps of Engineers, Hanover, New Hampshire, USA

<sup>5</sup>Department of Civil and Architectural Engineering & Construction Management, University of Wyoming, Laramie, Wyoming, USA

<sup>6</sup>Geophysical Institute, University of Alaska, Fairbanks, Alaska, USA

<sup>7</sup>Department of Geosciences, Boise State University, Boise, Idaho, USA

<sup>8</sup>Hydrological Sciences Laboratory, NASA Goddard Space Flight Center, Greenbelt, Maryland, USA

<sup>9</sup>Science Systems Applications Inc., Lanham, Maryland, USA

*Correspondence to:* Kajsia Holland-Goon (krhollgoon@gmail.com), Daniel McGrath (dmcgrath@colostate.edu)

## *Contents:*

Text S1

Tables S1–S4

Figures S1–S5

Data Availability

References

## Supplemental Text

### S1 Ground-Penetrating Radar Systems and Methods

We operated four ground-penetrating radar (GPR) systems to cover the five field sites, including two surface-coupled 1.0 GHz center-frequency PulseEKKO Pro single transceiver/receiver systems, an air-coupled 1.0 GHz center-frequency PulseEKKO Pro single transceiver with dual polarization receivers system, and a surface-coupled 1.6 GHz GSSI single transceiver/receiver system. The PulseEKKO Pro systems have a 6 dB bandwidth of 500–1500 MHz, whereas the GSSI system has a 6 dB bandwidth of 800–2400 MHz. Each GPR used a GPS system to provide locations for collected traces: the air-coupled PulseEKKO Pro used a Geode dGPS system ( $\pm 0.5$  m accuracy), the two sled-coupled PulseEKKO Pro GPRs used Emlid RS2 rovers with Emlid RS2 bases located nearby for post-kinematic processing ( $\pm 0.5$  m accuracy), and the sled-coupled GSSI GPR used a commercial-quality GPS system ( $\pm 3$  m accuracy).

The two-way travel times (*twtt*) of the snow-ground interface were manually identified for all single-polarization GPR datasets (e.g., McGrath et al., 2019), but the *twtt* for the dual-polarization GPR dataset was obtained by utilizing the coherent reflection between the two receivers (further details provided in Meehan et al., 2024). The *twtt* can be converted to snow depth with an estimate of the snowpack radar velocity ( $v_s$ ; Daniels, 2004)

$$v_s = \frac{c}{\sqrt{\epsilon_s}}, \quad (1)$$

where  $c$  is the speed of electromagnetic energy in a vacuum and  $\epsilon_s$  is the dielectric permittivity of the snowpack. Snowpack conditions were dry during our surveys, thus, the relative permittivity can be approximated from the bulk snow density ( $\rho_s$ ) through an empirical relation (Kovacs et al., 1995)

$$\sqrt{\epsilon_s} = 1 + \frac{0.845 \times \rho_s}{1000}. \quad (2)$$

Snow density was sampled in snow pits adjacent to the surveyed transects using 1000 cm<sup>3</sup> wedge samplers at 10 cm intervals along two columns in the snow pit. If density measurements differed by more than 10% for a single layer, a third measurement was acquired. For layers with three measurements, we excluded the measurement with the largest difference. We then calculated bulk snow densities as the column average. Finally, snow depth ( $D_s$ ) is calculated as

$$D_s = \frac{twtt}{2} \times v_s. \quad (3)$$

**Supplemental Tables**

**Table S1: Daily snow depth accumulation measurements during the March 2023 SnowEx campaign. Measurements from Farmers Loop/Creamer's Field (FLCF) were obtained from the Creamer's Field SNOTEL station (Site ID: 1302). Measurements obtained from the Caribou/Poker Creek Research Watershed (CPCRW) and Upper Kuparuk-Toolik (UKT) field sites were collected on storm interval boards. No measurements were available from the Bonanza Creek Experimental Forest (BCEF). Arctic Coastal Plain (ACP) snow depth accumulation was estimated from precipitation measurements (estimated snow density = 75 kg m<sup>-3</sup>) obtained from the NOAA AK Deadhorse 3 S weather station. Trace indicates accumulated snow depth of <0.01 m.**

| Date     | FLCF   | CPCRW          | UKT            | ACP    |
|----------|--------|----------------|----------------|--------|
| 8 March  | 0 m    | Trace          | 0.18 m         | 0.02 m |
| 9 March  | 0.03 m | 0.08 m         | 0 m            | 0 m    |
| 10 March | 0.03 m | 0.02 m         | 0 m            | Trace  |
| 11 March | 0 m    | No Observation | 0.02 m         | Trace  |
| 12 March | 0 m    | Trace          | No Observation | 0.02 m |
| 13 March | 0.05 m | No Observation | 0.03 m         | 0 m    |
| 14 March | 0 m    | No Observation | 0 m            | 0 m    |
| 15 March | 0 m    | No Observation | 0 m            | 0 m    |

Table S2: Boreal forest 2023 snow depth means and standard deviations (std) from GPR, excavated depth, and lidar transect profiles. Snow densities used to calculate radar velocity for the GPR snow depths are also given.

| Site   | Date     | Transect ID | Bulk Snow Density (kg m <sup>-3</sup> ) | GPR Mean (m) | GPR std (m) | Excavated Mean (m) | Excavated std (m) | Lidar mean (m) | Lidar std (m) |
|--------|----------|-------------|-----------------------------------------|--------------|-------------|--------------------|-------------------|----------------|---------------|
| FLCF   | 7 March  | DN013       | 207                                     | 0.56         | 0.06        | 0.48               | 0.05              | 0.40           | 0.10          |
|        |          | CN069       | 253                                     | 0.58         | 0.05        | 0.56               | 0.05              | 0.36           | 0.05          |
|        | 8 March  | WN104       | 197                                     | 0.85         | 0.04        | 0.51               | 0.11              | 0.52           | 0.07          |
|        |          | DN040       | 218                                     | 0.74         | 0.02        | 0.42               | 0.13              | 0.49           | 0.14          |
|        | 9 March  | WB032       | 163                                     | 0.64         | 0.02        | 0.60               | 0.09              | 0.03           | 0.08          |
|        | 10 March | EB100       | 187                                     | 0.54         | 0.08        | 0.59               | 0.09              | 0.36           | 0.09          |
|        | 11 March | DN091       | 193                                     | 0.60         | 0.05        | 0.73               | 0.03              | 0.51           | 0.07          |
|        | 13 March | DB106       | 208                                     | 0.48         | 0.08        | 0.60               | 0.06              | 0.31           | 0.01          |
| BCEF   | 10 March | WB497       | 204                                     | 0.76         | 0.07        | 0.69               | 0.08              | 0.45           | 0.06          |
|        | 13 March | DB337       | 208                                     | 0.63         | 0.07        | 0.55               | 0.10              | 0.49           | 0.06          |
|        | 14 March | SA326       | 225                                     | 0.81         | 0.08        | 0.76               | 0.09              | 0.65           | 0.06          |
|        | 15 March | WA437       | 198                                     | 0.96         | 0.06        | 0.74               | 0.15              | 0.73           | 0.03          |
| CPCR W | 8 March  | DB247       | 214                                     | 0.84         | 0.05        | 0.71               | 0.10              | 0.61           | 0.06          |
|        | 9 March  | DB254       | 207                                     | 0.80         | 0.04        | 0.80               | 0.04              | 0.41           | 0.12          |
|        | 11 March | WN281       | 193                                     | 0.95         | 0.07        | 0.91               | 0.13              | 0.72           | 0.03          |
|        |          | WA282       | 208                                     | 0.77         | 0.03        | 0.79               | 0.05              | 0.70           | 0.03          |
|        | 14 March | EA229       | 250                                     | 0.73         | 0.05        | 0.72               | 0.11              | 0.74           | 0.06          |

**Table S3: Arctic Coastal Plain 2023 snow depth means and standard deviations (std) from GPR, excavated depth, and lidar transect profiles. Snow densities used to calculate radar velocity for the GPR snow depths are also given.**

| <b>Date</b> | <b>Transect ID</b> | <b>Bulk Snow Density (kg m<sup>-3</sup>)</b> | <b>GPR Mean (m)</b> | <b>GPR std (m)</b> | <b>Excavated Mean (m)</b> | <b>Excavated std (m)</b> | <b>Lidar mean (m)</b> | <b>Lidar std (m)</b> |
|-------------|--------------------|----------------------------------------------|---------------------|--------------------|---------------------------|--------------------------|-----------------------|----------------------|
| 11 March    | A557               | 317                                          | 0.31                | 0.05               | 0.25                      | 0.07                     | 0.44                  | 0.02                 |
|             | N556               | 234                                          | 0.31                | 0.06               | 0.30                      | 0.05                     | 0.58                  | 0.01                 |
| 12 March    | A500               | 256                                          | 0.45                | 0.10               | 0.41                      | 0.09                     | 0.55                  | 0.07                 |
|             | N501               | 243                                          | 0.30                | 0.03               | 0.28                      | 0.02                     | 0.39                  | 0.04                 |
|             | N502               | 256                                          | 0.18                | 0.05               | 0.17                      | 0.05                     | 0.37                  | 0.02                 |
| 13 March    | A522               | 255                                          | 0.42                | 0.02               | 0.43                      | 0.03                     | 0.62                  | 0.02                 |
|             | A523               | 295                                          | 0.41                | 0.07               | 0.30                      | 0.05                     | 0.45                  | 0.03                 |
|             | I529               | 283                                          | 0.26                | 0.05               | 0.24                      | 0.06                     | 0.41                  | 0.03                 |
|             | N524               | 311                                          | 0.26                | 0.05               | 0.28                      | 0.06                     | 0.56                  | 0.02                 |
| 14 March    | N547               | 276                                          | 0.30                | 0.02               | 0.20                      | 0.04                     | 0.42                  | 0.01                 |
|             | A548               | 255                                          | 0.32                | 0.06               | 0.34                      | 0.05                     | 0.52                  | 0.03                 |
|             | I549               | 359                                          | 0.40                | 0.04               | 0.39                      | 0.04                     | 0.50                  | 0.05                 |
|             | N546               | 247                                          | 0.37                | 0.10               | 0.32                      | 0.09                     | 0.56                  | 0.03                 |

**Table S4: Upper Kuparuk-Toolik 2023 snow depth means and standard deviations (std) from GPR, excavated depth, and lidar transect profiles. Snow densities used to calculate radar velocity for the GPR snow depths are also given.**

| Date     | Transect ID | Bulk Snow Density (kg m <sup>-3</sup> ) | GPR Mean (m) | GPR std (m) | Excavated Mean (m) | Excavated std (m) | Lidar mean (m) | Lidar std (m) |
|----------|-------------|-----------------------------------------|--------------|-------------|--------------------|-------------------|----------------|---------------|
| 8 March  | N659        | 291                                     | 0.46         | 0.02        | 0.49               | 0.06              | 0.61           | 0.01          |
| 9 March  | A784        | 225                                     | 0.45         | 0.05        | 0.38               | 0.05              | 0.47           | 0.03          |
|          | N787        | 238                                     | 0.70         | 0.27        | 0.80               | 0.17              | 0.76           | 0.11          |
|          | N789        | 274                                     | 0.53         | 0.10        | 0.57               | 0.14              | 0.57           | 0.06          |
|          | N786        | 231                                     | 0.72         | 0.06        | 0.56               | 0.10              | 0.69           | 0.08          |
|          | N788        | 250                                     | 0.92         | 0.06        | 0.64               | 0.04              | 0.81           | 0.05          |
|          | A790        | 291                                     | 0.38         | 0.07        | 0.42               | 0.07              | 0.42           | 0.03          |
| 10 March | A766        | 220                                     | 0.46         | 0.08        | 0.49               | 0.07              | 0.30           | 0.07          |
|          | N762        | 225                                     | 0.39         | 0.05        | 0.41               | 0.04              | 0.31           | 0.06          |
|          | A760        | 226                                     | 0.54         | 0.09        | 0.54               | 0.06              | 0.39           | 0.03          |
|          | A759        | 229                                     | 0.42         | 0.10        | 0.44               | 0.09              | 0.39           | 0.04          |
| 11 March | N730        | 214                                     | 0.39         | 0.04        | 0.47               | 0.03              | 0.29           | 0.08          |
|          | A739        | 233                                     | 0.40         | 0.03        | 0.40               | 0.04              | 0.26           | 0.03          |
| 15 March | D698        | 229                                     | 0.39         | 0.04        | 0.42               | 0.08              | 0.48           | 0.08          |

**Supplemental Figures**

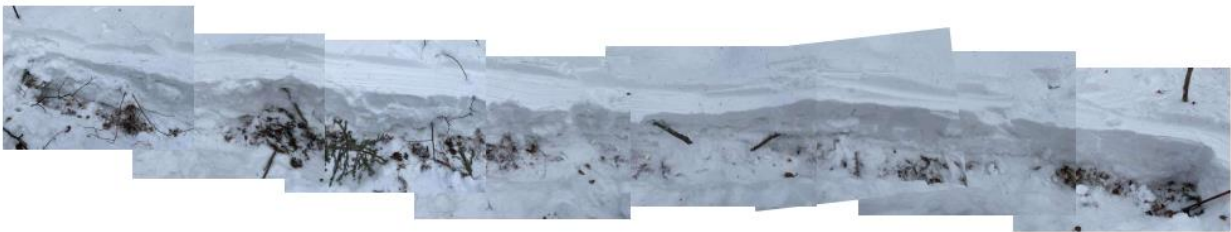

**Figure S1: Photo mosaic of Transect DN013 from 7 March 2023 in Farmers Loop/Creamer's Field. Approximate length is 10 m.**

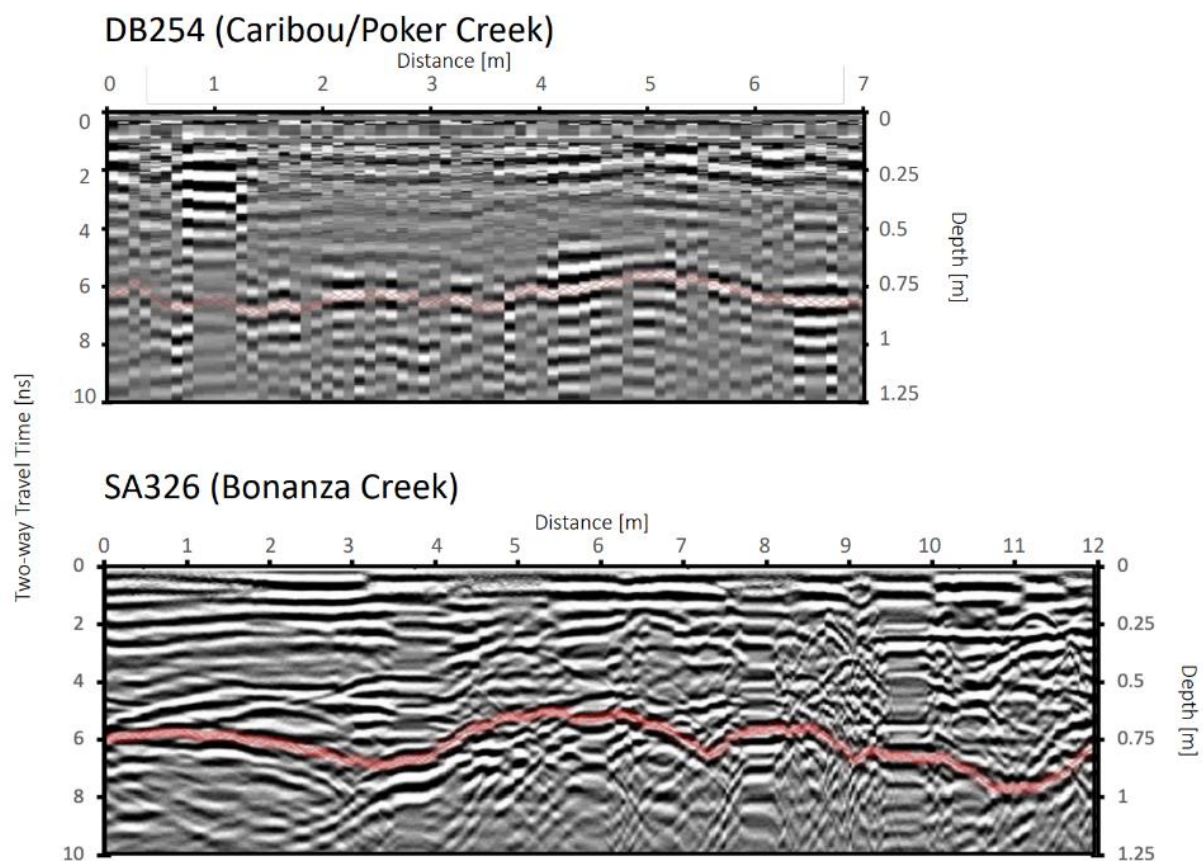

Figure S2: Radargrams showing transects DB254 from Caribou/Poker Creek Research Watershed and SA326 from Bonanza Creek Experimental Forest. Transect DB254 was surveyed team with the 1.0 GHz GPR and, whereas transect SA326 was surveyed with the 1.6 GHz GPR, demonstrating the resolution difference between GPRs.

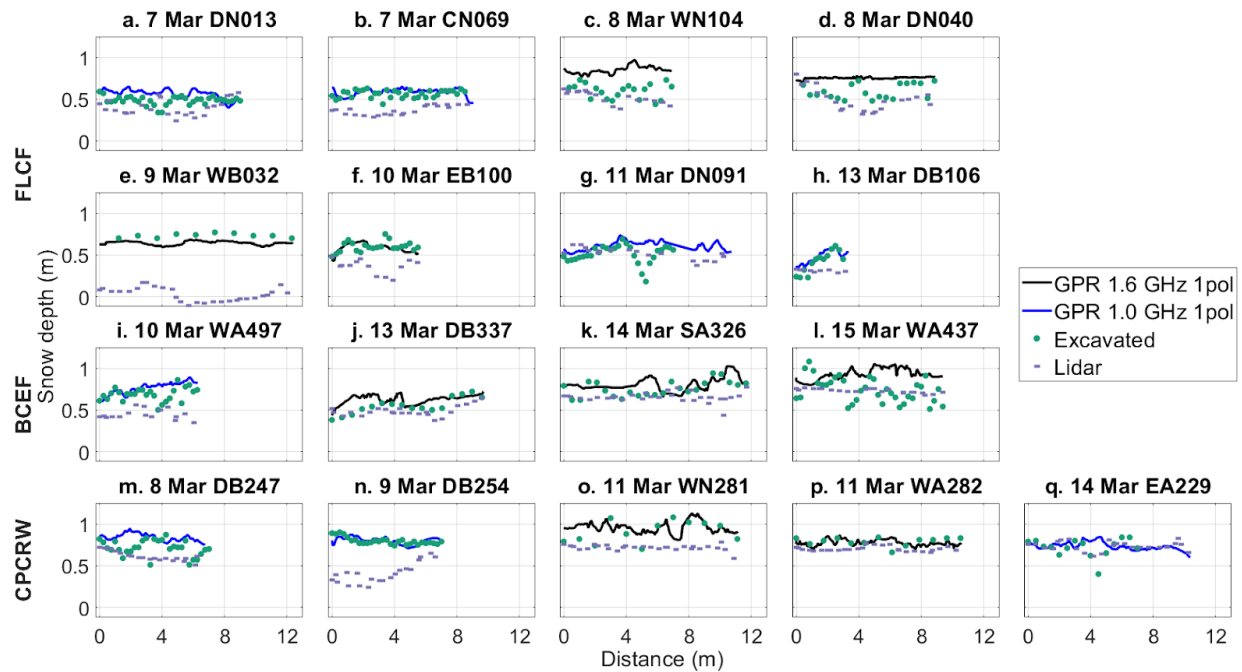

Figure S3: Snow depth profiles at the boreal forest for the (a–h) Farmer’s Loop/Creamer’s Field (FLCF), (i–l) Bonanza Creek Experimental Forest (BCEF), and (m–q) Caribou/Poker Creek Research Watershed (CPCRW) field sites. GPR snow depth profiles were collected by the CRREL 1.6 GHz GPR system and the Colorado State University 1.0 GHz GPR system. Subplots are labeled by transect numbers.

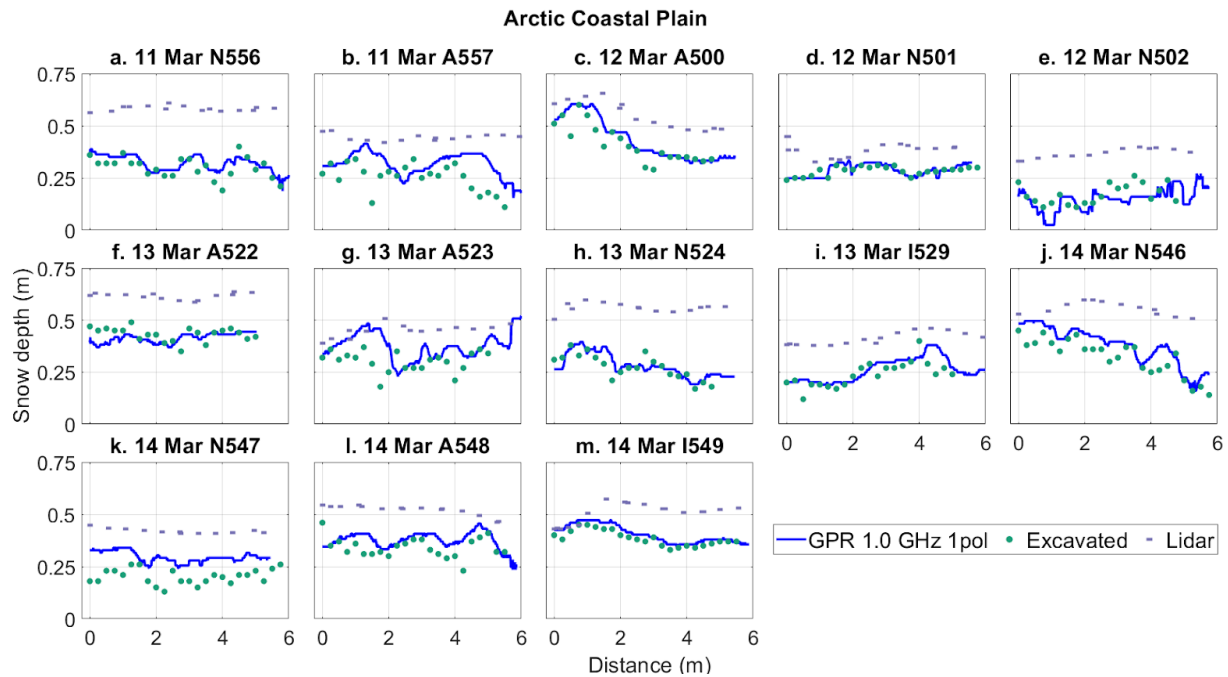

Figure S4: Snow depth profiles at the Arctic Coastal Plain tundra field site organized by date and transect number. GPR snow depth profiles were collected by the University of Wyoming 1.0 GHz GPR system.



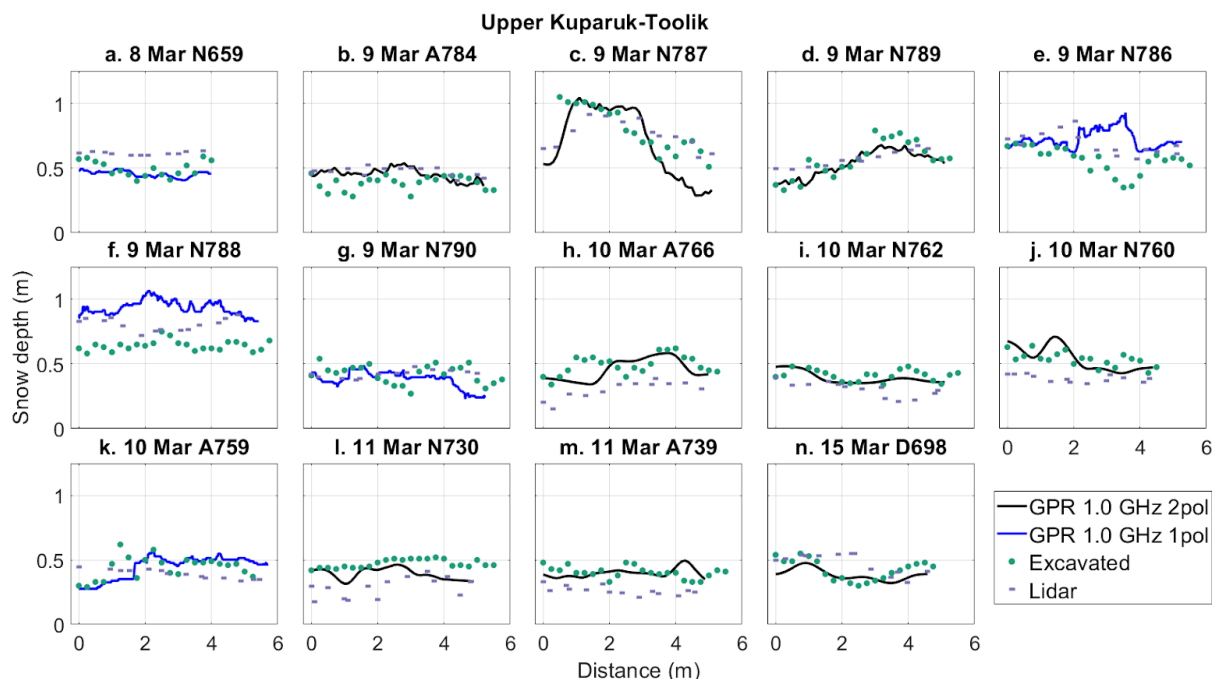

**Figure S5: Snow depth profiles at the Upper Kugaruk-Toolik tundra field site organized by date and transect ID. GPR snow depth profiles were collected by the University of Wyoming 1.0 GHz GPR system and the CRREL dual-polarization 1.0 GHz GPR system.**

## Data Availability

GPR, lidar, and snow pit data are archived with the NSIDC DAAC (Bonnell and McGrath, 2024; Larsen, 2024; Mason et al., 2024; Meehan and Rowland, 2024; Webb, 2024). Creamer's Field SNOTEL data are available at <https://wcc.sc.egov.usda.gov/nwcc/site?sitenum=1302>. NOAA AK Deadhorse 3 S weather station data are available at <https://www.ncei.noaa.gov/access/crn/sensors.htm?stationId=1793>.

Any use of trade, firm, or product names is for descriptive purposes only and does not imply endorsement by the U.S. Government.

## References

- Bonnell, R. and McGrath, D.: SnowEx23 Colorado State University Ground Penetrating Radar Raw, Version 1 [data set], NASA National Snow and Ice Data Center Distributed Active Archive Center, <https://doi.org/10.5067/VGIDSZVEXMSQ>, 2024.
- Daniels, D. J. (Ed): Ground Penetrating Radar, Volume 1, The Institution of Electrical Engineers, 2004.
- Kovacs, A., Gow, A. J., and Morey, R. M.: The in-situ dielectric constant of polar firn revisited, Cold Regions Science and Technology, 23, 245–256, [https://doi.org/10.1016/0165-232X\(94\)00016-Q](https://doi.org/10.1016/0165-232X(94)00016-Q), 1995.

177 Larsen, C.: SnowEx23 Airborne Lidar-Derived 0.25M Snow Depth and Canopy Height, Version 1 [data set], NASA  
 178 National Snow and Ice Data Center Distributed Active Archive Center, <https://doi.org/10.5067/BV4D8RRU1H7U>,  
 179 2024.

180 Mason, M., Vuyovich, C. M., Stuefer, S., Elder, K., Vas, D., Marshall, H., and Durand, M.: SnowEx23 Mar23 Snow  
 181 Pit Measurements, Version 1 [data set], NASA National Snow and Ice Data Center Distributed Active Archive Center,  
 182 <https://doi.org/413819/SJZ90KNPKCYR>, 2024.

183 McGrath, D., Webb, R., Shean, D., Bonnell, R., Marshall, H.-P., Painter, T. H., Molotch, N. P., Elder, K., Hiemstra,  
 184 C., and Brucker, L.: Spatially Extensive Ground-Penetrating Radar Snow Depth Observations During NASA’s 2017  
 185 SnowEx Campaign: Comparison With In Situ, Airborne, and Satellite Observations, *Water Resources Research*, 55,  
 186 10026–10036, <https://doi.org/10.1029/2019WR024907>, 2019.

187 Meehan, T. G., Hojatimalekshah, A., Marshall, H.-P., Deeb, E. J., O’Neel, S., McGrath, D., Webb, R. W., Bonnell,  
 188 R., Raleigh, M. S., Hiemstra, C., and Elder, K.: Spatially distributed snow depth, bulk density, and snow water  
 189 equivalent from ground-based and airborne sensor integration at Grand Mesa, Colorado, USA, *The Cryosphere*, 18,  
 190 3253–3276, <https://doi.org/10.5194/tc-18-3253-2024>, 2024.

191 Meehan, T. G. and Rowland, T.: SnowEx23 CRREL Ground Penetrating Radar, Version 1 [data set], NASA National  
 192 Snow and Ice Data Center Distributed Active Archive Center, <https://doi.org/10.5067/TSU0U7L4X2UW>, 2024.

193 Webb, R.: SnowEx23 University of Wyoming Ground Penetrating Radar, Version 1 [data set]. NASA National Snow  
 194 and Ice Data Center Distributed Active Archive Center, <https://doi.org/10.5067/H3D9IT1W6JT6>, 2024.

195  
 196  
 197  
 198  
 199  
 200  
 201
